# Supplementary material for: Characterization of Mesothelin Glycosylation in Pancreatic Cancer: Decreased Core Fucosylated Glycoforms in Pancreatic Cancer Patients’ Sera
Source: MDPI journal article supplement (doi:10.3390/biomedicines10081942), 2022-08-10
Supplement: s1 [file s1]

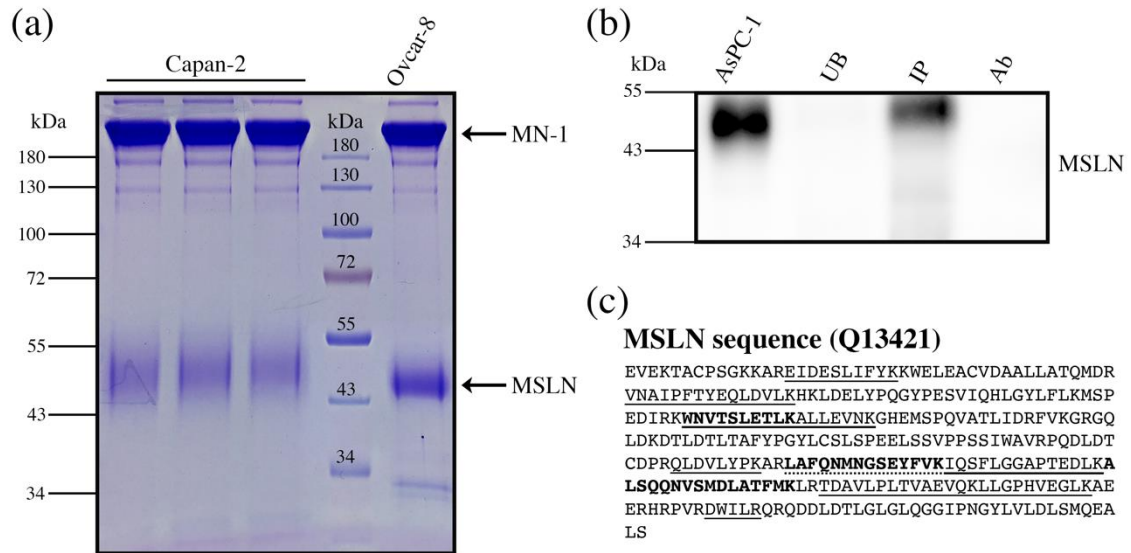

**Figure S1.** Mesothelin immunopurification with the anti-MSLN antibody (clone MN-1) used for subsequent glycosylation analyses. (a) Coomassie staining of immunopurified fractions from Capan-2 and Ovar-8 cells conditioned media; (b) Anti-MSLN western blotting of obtained fractions during mesothelin immunopurification from AsPC-1 conditioned media. UB: unbound fraction, IP: purified fraction, Ab: MN-1 antibody; (c) Peptide mapping on MSLN immunopurified bands by MS (UPLC-ESI-QToF). Peptides containing a N-glycosylation motif in bold. Underlined peptides were identified in all cell lines. Dot-underlined peptide was only identified in Capan-2 bands.

**Table S1.** *N*-glycans identified in rMSLN for each exoglycosidase digestion. Structures arranged by retention time (GU), representation following symbol nomenclature for glycans (SNFG) guidelines and abundance expressed as the percentage among all assigned *N*-glycans in that profile. Sialic acid form: Neu5Ac, Neu5Gc.

| Retention time (GU) | Structure       | Representation                                                                       | Abundance (%) |
|---------------------|-----------------|--------------------------------------------------------------------------------------|---------------|
| UNDIGESTED profile  |                 |                                                                                      |               |
| 9.25                | A3G2Ga2         | 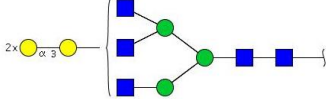   | 1.14          |
| 9.58                | FA3G3Ga1        |    | 0.88          |
| 9.92                | FA3F1G3Ga1      |    | 0.48          |
| 10.02               | FA3F3G3         |    | 2.18          |
| 10.25               | FA3F2G3Ga1      |    | 3.26          |
| 10.30               | A3F2G3S1(6)     |   | 1.52          |
| 10.48               | FA3G3Ga2        |  | 2.85          |
| 10.80               | FA3F1G3Ga2      |  | 13.56         |
| 10.93               | FA3G3S3(3,3,3)  |  | 1.38          |
| 11.06               | FA3G3S2(3,3)Ga1 |  | 6.80          |
| 11.39               | FA3G3Ga3        |  | 29.44         |
| 11.39               | FA3F1G3S1(3)Ga1 |  | 3.49          |
| 11.59               | FA3F1G3S1(6)Ga1 |  | 2.61          |

|                                |                 |                                                                                      |       |
|--------------------------------|-----------------|--------------------------------------------------------------------------------------|-------|
| 11.67                          | FA3G3S1(3)Ga2   | 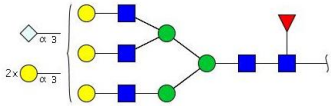   | 11.64 |
| 12.08                          | FA3G3S1(6)Ga2   |    | 9.89  |
| 12.28                          | FA3G3S3(6,6,6)  |    | 1.26  |
| 12.38                          | FA3G3S2(3,6)Ga1 |    | 3.58  |
| 12.67                          | FA3G3Lac1Ga3    |    | 4.05  |
| <b>+NANI digestion profile</b> |                 |                                                                                      |       |
| 8.76                           | FA3G3           |    | 1.53  |
| 9.25                           | A3G2Ga2         |   | 1.46  |
| 9.58                           | FA3G3Ga1        |  | 7.20  |
| 9.92                           | FA3F1G3Ga1      |  | 3.95  |
| 10.02                          | FA3F3G3         |  | 2.12  |
| 10.25                          | FA3F2G3Ga1      |  | 2.97  |
| 10.30                          | A3F2G3S1(6)     |  | 1.46  |
| 10.48                          | FA3G3Ga2        |  | 16.35 |
| 10.80                          | FA3F1G3Ga2      |  | 12.50 |
| 11.32                          | FA3G3S1(6)Ga1   |  | 3.86  |

|                               |                 |                                                                                      |       |
|-------------------------------|-----------------|--------------------------------------------------------------------------------------|-------|
| 11.39                         | FA3G3Ga3        | 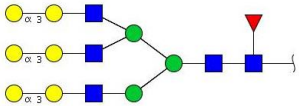   | 31.20 |
| 11.59                         | FA3F1G3S1(6)Ga1 |    | 2.28  |
| 12.08                         | FA3G3S1(6)Ga2   |    | 8.59  |
| 12.28                         | FA3G3S3(6,6,6)  |    | 1.25  |
| 12.67                         | FA3G3Lac1Ga3    |    | 3.27  |
| <b>+ABS digestion profile</b> |                 |                                                                                      |       |
| 8.76                          | FA3G3           |    | 3.37  |
| 9.13                          | A3F2G3          |   | 1.50  |
| 9.25                          | A3G2Ga2         |  | 1.47  |
| 9.58                          | FA3G3Ga1        |  | 13.32 |
| 9.92                          | FA3F1G3Ga1      |  | 6.66  |
| 10.02                         | FA3F3G3         |  | 2.34  |
| 10.25                         | FA3F2G3Ga1      |  | 3.41  |
| 10.48                         | FA3G3Ga2        |  | 24.10 |
| 10.80                         | FA3F1G3Ga2      |  | 12.55 |
| 11.39                         | FA3G3Ga3        |  | 28.16 |

|                                       |              |  |       |
|---------------------------------------|--------------|--|-------|
| 12.67                                 | FA3G3Lac1Ga3 |  | 3.13  |
| <b>+ABS+BTG digestion profile</b>     |              |  |       |
| 6.20                                  | FA3          |  | 3.82  |
| 7.78                                  | FA3G1Ga1     |  | 10.39 |
| 8.24                                  | A3F2G2       |  | 1.12  |
| 8.97                                  | FA3F1G2Ga1   |  | 7.06  |
| 9.25                                  | A3G2Ga2      |  | 1.60  |
| 9.58                                  | FA3G2Ga2     |  | 23.63 |
| 10.02                                 | FA3F3G3      |  | 2.37  |
| 10.25                                 | FA3F2G3Ga1   |  | 3.31  |
| 10.80                                 | FA3F1G3Ga2   |  | 13.09 |
| 11.39                                 | FA3G3Ga3     |  | 29.79 |
| 12.67                                 | FA3G3Lac1Ga3 |  | 3.83  |
| <b>+ABS+BTG+BKF digestion profile</b> |              |  |       |
| 5.79                                  | A3           |  | 6.94  |
| 7.46                                  | A3G1Ga1      |  | 20.54 |

|                                               |             |                                                                                      |        |
|-----------------------------------------------|-------------|--------------------------------------------------------------------------------------|--------|
| 9.25                                          | A3G2Ga2     | 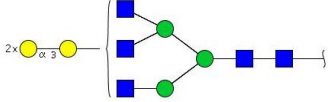   | 37.48  |
| 11.04                                         | A3G3Ga3     |    | 31.08  |
| 12.35                                         | A3G3Lac1Ga3 |    | 3.97   |
| <b>+ABS+BTG+BKF+GUH digestion profile</b>     |             |                                                                                      |        |
| 4.30                                          | M3          |    | 7.12   |
| 6.66                                          | A1G1Ga1     |    | 20.88  |
| 8.88                                          | A2G2Ga2     |    | 38.34  |
| 11.04                                         | A3G3Ga3     |   | 30.22  |
| 12.35                                         | A3G3Lac1Ga3 |  | 3.44   |
| <b>+ABS+BTG+BKF+GUH+CBG digestion profile</b> |             |                                                                                      |        |
| 4.30                                          | M3          |  | 100.00 |

**Table S2.** *N*-glycans identified in mesothelin from Ovar-8 conditioned media for each exoglycosidase digestion. Structures ordered by retention time (GU), representation following SNFG guidelines and abundance expressed as the percentage among all assigned *N*-glycans in that profile.

| Retention time (GU)            | Structure   | Representation                                                                                                         | Abundance (%) |
|--------------------------------|-------------|------------------------------------------------------------------------------------------------------------------------|---------------|
| <b>+NANI digestion profile</b> |             |                                                                                                                        |               |
| 7.55                           | FA2G2       | 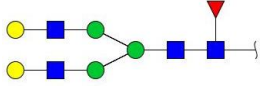                                     | 2.12          |
| 7.59                           | FA2BG2      |                                      | 2.12          |
| 8.32                           | FA2F1G2     | <br>*fucose linked to antenna GlcNAc | 2.95          |
| 8.32                           | A3G3        |                                     | 3.50          |
| 8.72                           | FA3G3       |                                    | 4.41          |
| 8.72                           | FA2G2S1(6)  |                                    | 2.41          |
| 8.72                           | FA2BG2S1(6) |                                    | 1.13          |
| 8.92                           | FA3BG3      |                                    | 2.94          |
| 9.00                           | FA2F2G2     |                                    | 2.89          |
| 9.53                           | A4G4        |                                    | 5.55          |

|       |                 |  |       |
|-------|-----------------|--|-------|
| 10.11 | FA4G4           |  | 18.73 |
| 10.11 | FA4BG4          |  | 8.67  |
| 10.67 | FA3F1G3Lac1     |  | 5.38  |
| 10.83 | FA3BF1G3Lac1    |  | 2.06  |
| 10.83 | A4F2G4          |  | 6.01  |
| 11.16 | FA3G3Lac1S1(6)  |  | 8.05  |
| 11.16 | FA3BG3Lac1S1(6) |  | 2.94  |
| 11.16 | FA4G4S1(6)      |  | 7.35  |
| 11.37 | FA4G4Lac1       |  | 5.16  |
| 11.45 | FA4BG4Lac1      |  | 5.64  |



| +ABS digestion profile |           |                                                                                      |       |  |
|------------------------|-----------|--------------------------------------------------------------------------------------|-------|--|
| 7.55                   | FA2G2     | 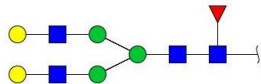   | 4.49  |  |
| 7.59                   | FA2BG2    |    | 3.17  |  |
| 8.32                   | FA2F1G2   |    | 3.20  |  |
| 8.32                   | A3G3      |    | 3.50  |  |
| 8.72                   | FA3G3     |   | 4.44  |  |
| 8.92                   | FA3BG3    |  | 2.73  |  |
| 9.00                   | FA2F2G2   |  | 2.71  |  |
| 9.53                   | A4G4      |  | 3.69  |  |
| 10.11                  | FA4G4     |  | 23.12 |  |
| 10.11                  | FA4BG4    |  | 8.03  |  |
| 10.23                  | FA3G3Lac1 |  | 8.19  |  |

|                            |              |                                                                       |      |
|----------------------------|--------------|-----------------------------------------------------------------------|------|
| 10.23                      | FA3BG3Lac1   |                                                                       | 2.60 |
| 10.67                      | FA3F1G3Lac1  |                                                                       | 5.28 |
|                            |              | *fucose linked to antenna GlcNAc                                      |      |
| 10.83                      | FA3BF1G3Lac1 |                                                                       | 2.01 |
|                            |              | *fucose linked to antenna GlcNAc                                      |      |
| 10.83                      | A4F2G4       |                                                                       | 7.76 |
|                            |              | * $\alpha 2$ fucose linked to Gal<br>*fucose linked to antenna GlcNAc |      |
| 11.37                      | FA4G4Lac1    |                                                                       | 5.71 |
| 11.45                      | FA4BG4Lac1   |                                                                       | 9.37 |
| +ABS+BTG digestion profile |              |                                                                       |      |
| 5.82                       | FA2          |                                                                       | 4.40 |
| 5.82                       | FA2B         |                                                                       | 3.16 |
| 5.82                       | A3           |                                                                       | 1.76 |
| 6.25                       | FA3          |                                                                       | 4.98 |
| 6.38                       | FA3B         |                                                                       | 2.45 |

|      |                 |                                                                                      |       |
|------|-----------------|--------------------------------------------------------------------------------------|-------|
| 6.54 | A4              | 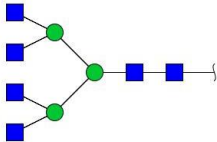   | 4.03  |
| 6.93 | FA4             |    | 23.30 |
| 6.98 | FA4B            |    | 8.88  |
| 7.44 | FA2F1G1         |    | 3.23  |
| 7.65 | FA3G1GlcNAc1    |    | 8.87  |
| 7.68 | FA3BG1GlcNAc1   |  | 4.54  |
| 8.08 | FA4G1GlcNAc1    |  | 5.14  |
| 8.17 | FA4BG1GlcNAc1   |  | 8.75  |
| 8.43 | FA3F1G1GlcNAc1  |  | 4.86  |
| 8.49 | FA3BF1G1GlcNAc1 |  | 2.00  |
| 9.00 | FA2F2G2         |  | 3.10  |

|                                       |               |  |       |
|---------------------------------------|---------------|--|-------|
| 9.08                                  | A4F2G2        |  | 6.55  |
| *Gal and *Fuc linked to same GlcNAc   |               |  |       |
| <b>+ABS+BTG+AMF digestion profile</b> |               |  |       |
| 5.82                                  | FA2           |  | 9.75  |
| 5.82                                  | FA2B          |  | 3.24  |
| 5.82                                  | A3            |  | 1.60  |
| 6.25                                  | FA3           |  | 4.60  |
| 6.38                                  | FA3B          |  | 2.52  |
| 6.54                                  | A4            |  | 3.23  |
| 6.93                                  | FA4           |  | 23.00 |
| 6.98                                  | FA4B          |  | 10.84 |
| 7.65                                  | FA3G1GlcNAc1  |  | 11.08 |
| 7.68                                  | FA3BG1GlcNAc1 |  | 6.64  |

|                                       |               |                                                                                      |       |
|---------------------------------------|---------------|--------------------------------------------------------------------------------------|-------|
| 7.68                                  | A4F1G1        | 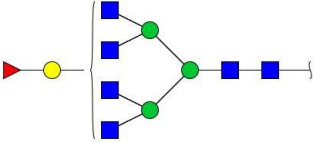   | 7.77  |
| 8.08                                  | FA4G1GlcNAc1  |    | 5.62  |
| 8.17                                  | FA4BG1GlcNAc1 |    | 10.11 |
| <b>+ABS+BTG+BKF digestion profile</b> |               |                                                                                      |       |
| 5.36                                  | A2            |    | 10.13 |
| 5.48                                  | A2B           |   | 3.37  |
| 5.82                                  | A3            |  | 5.68  |
| 5.86                                  | A3B           |  | 2.61  |
| 6.54                                  | A4            |  | 33.86 |
| 6.62                                  | A4B           |  | 10.91 |
| 7.29                                  | A3G1GlcNAc1   |  | 11.16 |
| 7.41                                  | A3BG1GlcNAc1  |  | 6.83  |

|                                           |              |                                                                                     |       |
|-------------------------------------------|--------------|-------------------------------------------------------------------------------------|-------|
| 7.73                                      | A4G1GlcNAc1  | 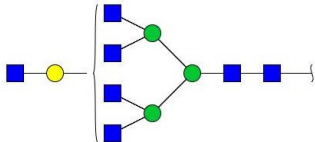  | 5.48  |
| 7.84                                      | A4BG1GlcNAc1 |   | 9.97  |
| <b>+ABS+BTG+BKF+GUH digestion profile</b> |              |                                                                                     |       |
| 4.25                                      | M3           |   | 67.03 |
| 4.65                                      | M3B          |   | 12.46 |
| 6.59                                      | A4B          |  | 20.51 |

**Table S3.** *N*-glycans identified in mesothelin from PaC cell lines conditioned media after ABS digestion. Structures ordered by retention time (GU), representation following SNFG guidelines and abundance expressed as the percentage among all assigned *N*-glycans.

| Retention time (GU) | Structure | Representation                                                                       | Abundance (%) |        |
|---------------------|-----------|--------------------------------------------------------------------------------------|---------------|--------|
|                     |           |                                                                                      | Capan-2       | AsPC-1 |
| 7.55                | FA2G2     | 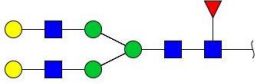   | 10.49         | 6.74   |
| 8.72                | FA3G3     |    | 21.80         | 21.12  |
| 10.11               | FA4G4     |    | 25.66         | 26.69  |
| 11.37               | FA4G4Lac1 |   | 14.98         | 30.94  |
| 12.61               | FA4G4Lac2 |  | 27.07         | 14.51  |
